# Supplementary material
Source: Springer Nature journal article supplement (https://www.springermedizin.de/resource/supplementary/13019_2010_281_MOESM1_ESM.pdf/9638290)

13351 - 5.106  
XY91.00mm  
+0.0D

120kV/50mAs/EC  
0.5s/7.0mm/0.5 x64  
HP53.0

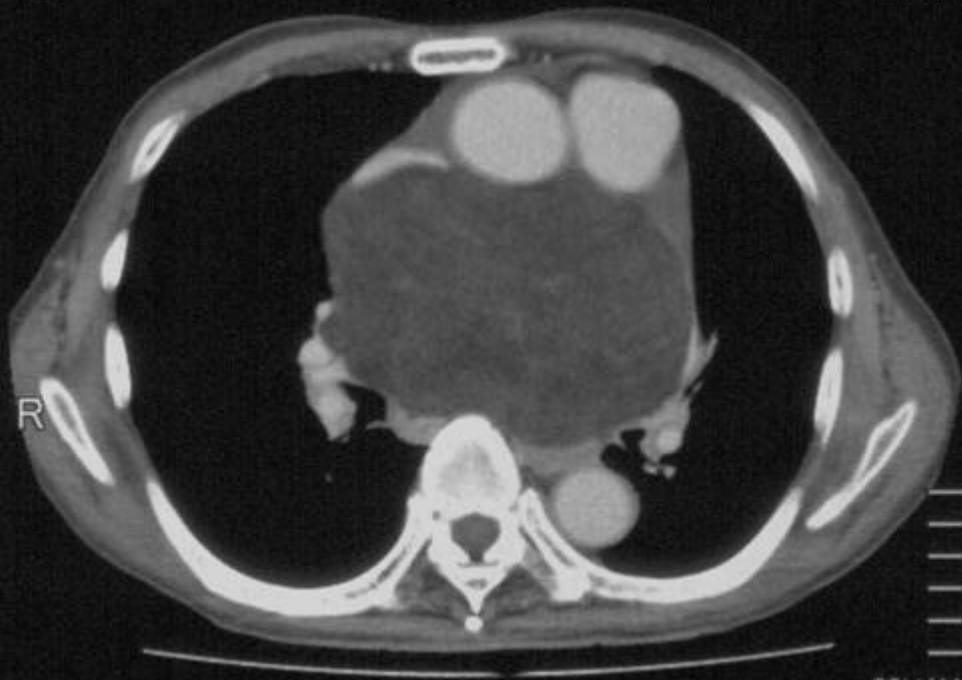

83Y/M

Supplement: MOESM1 [file 9638290]
